# Supplementary material for: A Geometric Clustering Tool (AGCT) to robustly unravel the inner cluster structures of time-series gene expressions
Source: PLOS journal article supplement (doi:10.1371/journal.pone.0233755), 2020-07-06
Supplement: S14 (10.1371/journal.pone.0233755.s014) [file journal.pone.0233755.s014]

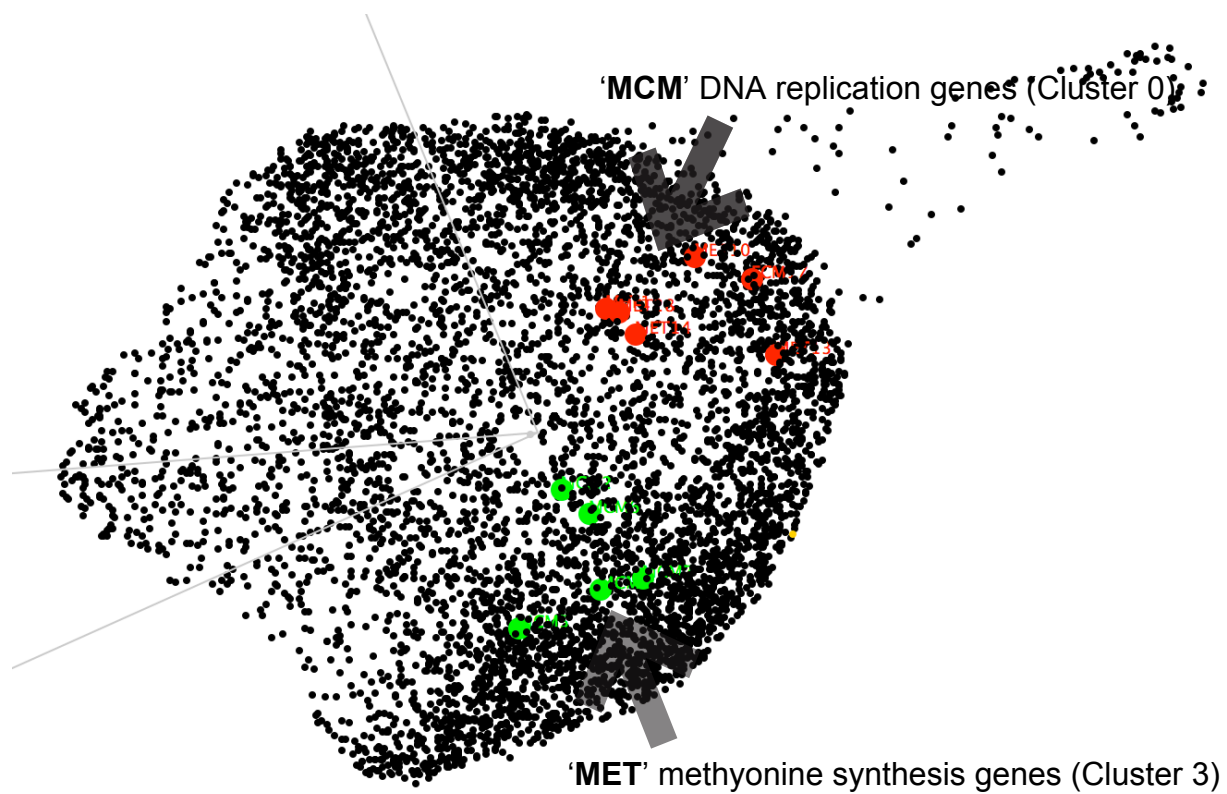

**Figure S19:** View of 'MCM' DNA replication genes and 'MET' methionine synthesis genes on the manifold.
